# Supplementary material for: Antiviral Toll-like Receptor Signaling in Non-Parenchymal Liver Cells Is Restricted to TLR3
Source: MDPI journal article supplement (doi:10.3390/v14020218), 2022-01-24

## Supplementary Materials

Article

# Antiviral Toll-like Receptor Signaling in Non-Parenchymal Liver Cells Is Restricted to TLR3

Melanie Werner <sup>1,†,‡</sup>, Stefan Schefczyk <sup>1,†,‡</sup>, Martin Trippler <sup>1,‡</sup>, Juergen W. Treckmann <sup>2</sup>, Hideo A. Baba <sup>3</sup>, Guido Gerken <sup>1,4,‡</sup>, Joerg F. Schlaak <sup>1,5,‡</sup> and Ruth Broering <sup>1,\*,‡</sup>

<sup>1</sup> Department of Gastroenterology, Hepatology and Transplant Medicine, University Hospital of Essen, University Duisburg-Essen, Hufelandstr. 55, 45147 Essen, Germany; melanie.werner@uni-due.de (M.W.); stefan.schefczyk@uni-due.de (S.S.); Martin.Trippler@uk-essen.de (M.T.)

<sup>2</sup> Department of General-, Visceral- and Transplantation Surgery, University Hospital of Essen, University of Duisburg-Essen, Hufelandstr. 55, 45147 Essen, Germany; juergen-walter.treckmann@uk-essen.de (J.W.T.)

<sup>3</sup> Institute of Pathology, University Hospital of Essen, University of Duisburg-Essen, Hufelandstr. 55, 45147 Essen, Germany; hideo.baba@uk-essen.de (H.A.B.)

<sup>4</sup> Helios Hospital, Gastroenterology, Hepatology and Palliative Medicine, Robert-Koch-Straße 2, 42549 Velbert, Germany; guido.gerken@helios-gesundheit.de (G.G.)

<sup>5</sup> AMEOS Hospital, St. Clemens, Internal Medicine—Hepatology, Gastroenterology, Infectiology and Diabetology; Wilhelmstr. 34, 46145 Oberhausen, Germany; joerg.schlaak@ob.ameos.de (J.F.S.)

\* Correspondence: ruth.broering@uni-due.de; Tel.: +49-201-723-6015

† Contributed equally.

‡ Former Dept. of Gastroenterology and Hepatology.

## Content:

Supplementary Figures..... Page 2

Supplementary Tables..... Page 3

Original western blots..... Page 6

## Supplementary Figures

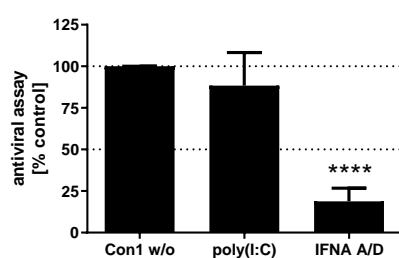

**Figure S1. HCV replicon system con1 does not respond to poly(I:C).** Subgenomic HCV replicon system con1 was treated with 50µg/ml poly(I:C) or 10IU/ml recombinant IFNA A/D. RNA was extracted after 72h and HCV replication was determined by qRT-PCR.

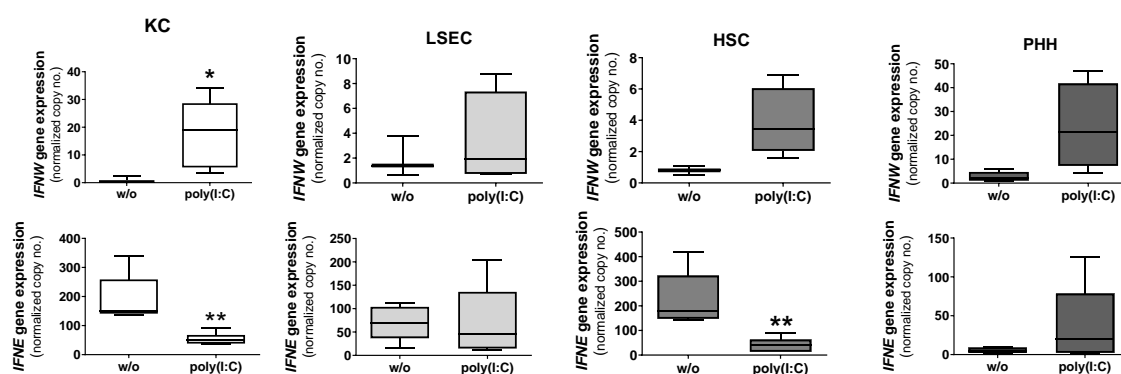

**Figure S2. NPC show low expression of IFNW and IFNE.** Gene expression of *IFNW* and *IFNE* was determined in NPC (n=3) treated with poly(I:C) for 6h. Data represent copy numbers as mean ± sd normalized to 100,000 copies of reference gene ACTB. Abbreviations: HSC, hepatic stellate cells; KC, Kupffer cells; LSEC, liver sinusoidal endothelial cells; nd, not detectable; sd, standard deviation; TLR, toll like receptor; w/o (without treatment)

## Supplementary Tables

**Table S1. Patients' characteristics**

| KC              | Control group (n=15)<br>mean $\pm$ sem | HCV group (n=10)<br>mean $\pm$ sem |
|-----------------|----------------------------------------|------------------------------------|
| transplantation | 3                                      | 9                                  |
| resection       | 12                                     | 1                                  |
| male            | 8                                      | 7                                  |
| female          | 7                                      | 3                                  |
| age             | 54.9 $\pm$ 4.2                         | 55.6 $\pm$ 2.1                     |
| GOT [IU/ml]     | 214.0 $\pm$ 57.7                       | 241.4 $\pm$ 119.6                  |
| GPT [IU/ml]     | 153.4 $\pm$ 37.6                       | 169.9 $\pm$ 77.0                   |
| fibrosis stage  | 1.5 $\pm$ 0.4                          | 3.9 $\pm$ 0.1                      |
| LSEC            | Control group (n=15)<br>mean $\pm$ sem | HCV group (n=10)<br>mean $\pm$ sem |
| transplantation | 2                                      | 10                                 |
| resection       | 13                                     | 0                                  |
| male            | 9                                      | 7                                  |
| female          | 6                                      | 3                                  |
| age             | 56.7 $\pm$ 4.6                         | 55.0 $\pm$ 1.1                     |
| GOT [IU/ml]     | 233.9 $\pm$ 64.1                       | 216.1 $\pm$ 115.3                  |
| GPT [IU/ml]     | 141.0 $\pm$ 40.6                       | 163.8 $\pm$ 77.5                   |
| fibrosis stage  | 1.7 $\pm$ 0.4                          | 3.7 $\pm$ 0.3                      |
| HSC             | Control group (n=15)<br>mean $\pm$ sem | HCV group (n=10)<br>mean $\pm$ sem |
| transplantation | 2                                      | 10                                 |
| resection       | 13                                     | 0                                  |
| male            | 5                                      | 9                                  |
| female          | 10                                     | 1                                  |
| age             | 58.5 $\pm$ 5.2                         | 53.1 $\pm$ 1.6                     |
| GOT [IU/ml]     | 277.3 $\pm$ 88.6                       | 222.3 $\pm$ 114.1                  |
| GPT [IU/ml]     | 187.1 $\pm$ 61.4                       | 164.7 $\pm$ 77.4                   |
| fibrosis stage  | 2.2 $\pm$ 0.5                          | 3.7 $\pm$ 0.3                      |

Data represent mean values $\pm$ sem. Abbreviations: GOT, glutamate oxaloacetate transaminase; GPT, glutamate pyruvate transaminase; HCV, hepatitis c virus; HSC, hepatic stellate cells; KC, Kupffer cells; LSEC, liver sinusoidal endothelial cells; sem, standard error of mean.

**Table S2. Primer sequences**

| Gene         | Forward primer sequence     | Reverse primer sequence     | Species |
|--------------|-----------------------------|-----------------------------|---------|
| <i>ACTB</i>  | 5'-TCCCTGGAGAAGAGCTACGA-3'  | 5'-AGCAATGTGTTGGCGTACAG-3'  | Hs      |
| <i>HCV</i>   | 5'-GCGGGTTGATCCAAGAAAGG-3'  | 5'-ATCACTCCCCTGTGAGGAACT-3' | Hs      |
| <i>MX1</i>   | 5'-AGCCACTGGACTGACGACTT-3'  | 5'-GAGGGCTGAAAATCCCTTTC-3'  | Hs      |
| <i>Ifi1</i>  | 5'-CTGAAATGCCAAGTAGCAAGG-3' | 5'-CCAAAGGCACAGACATAAGGA-3' | Mm      |
| <i>Gapdh</i> | 5'-AAATTCAACGGCACAGTCAA-3'  | 5'-TCTCCATGGTGGTGAAGACA-3'  | Mm      |

Table S3. Primary and secondary antibodies

| Protein                                  | Abbreviation     | Company           |
|------------------------------------------|------------------|-------------------|
| Interferon regulatory factor 3           | IRF3             | Abcam             |
| Phospho-interferon regulatory factor 3   | P-IRF3           | Abcam             |
| Nuclear factor kappa B                   | NF- $\kappa$ B   | Cell Signaling    |
| Phospho-nuclear factor kappa B           | P-NF- $\kappa$ B | Cell Signaling    |
| Mitogen-activated protein kinase (MAPK)  | MAPK             | Cell Signaling    |
| Phospho-mitogen-activated protein kinase | P-MAPK           | Cell Signaling    |
| Protein 38                               | p38              | Cell Signaling    |
| Phospho-protein 38                       | P-p38            | Cell Signaling    |
| c-Jun-amino-terminal kinases             | JNK              | Cell Signaling    |
| Phospho-c-Jun-amino-terminal kinases     | P-JNK            | Cell Signaling    |
| Serine/threonine-protein kinase          | AKT              | Cell Signaling    |
| Phospho-serine/threonine-protein kinas   | P-AKT            | Cell Signaling    |
| Actin beta                               | ACTB             | Sigma             |
| Glyceraldehyde 3-phosphate dehydrogenase | GAPDH            | GAPDH             |
| Goat anti-rabbit HRP-conjugated          | -                | Cell Signaling    |
| Goat anti-mouse HRP-conjugated           | -                | Thermo Scientific |

Abbreviations: HRP, horseradish peroxidase

Table S4. TLR-induced gene expression of inflammatory cytokines

| KC          |                       | IL6     |                    | TNF     |               | IL10    |  |
|-------------|-----------------------|---------|--------------------|---------|---------------|---------|--|
| Stimulation | mean ± sd             | p-value | mean ± sd          | p-value | mean ± sd     | p-value |  |
| w/o         | 9,862.3 ± 8,243.6     |         | 352.7 ± 164.2      |         | 148.9 ± 129.4 |         |  |
| Pam3CSK4    | 35,275.5 ± 19,675.9   | <0.001  | 2,509.5 ± 1,531.8  | <0.001  | 233.4 ± 121.6 | 0.071   |  |
| HKLM        | 47,645.5 ± 30,411.1   | <0.001  | 4,297.4 ± 3,641.0  | <0.001  | 467.4 ± 268.4 | <0.001  |  |
| poly(I:C)   | 27,112.3 ± 16,397.4   | 0.001   | 2,523.1 ± 1,394.3  | <0.001  | 151.8 ± 102.2 | 0.946   |  |
| LPS         | 49,002.0 ± 34,574.1   | <0.001  | 2,833.9 ± 2,204.5  | <0.001  | 346.7 ± 305.2 | 0.026   |  |
| flagellin   | 87,368.8 ± 44,872.0   | <0.001  | 10,402.4 ± 8,008.9 | <0.001  | 544.9 ± 309.8 | <0.001  |  |
| FSL-I       | 39,569.6 ± 23,103.9   | <0.001  | 3,599.6 ± 3,697.9  | 0.002   | 270.0 ± 177.0 | 0.037   |  |
| Gdq         | 56,604.8 ± 38,768.2   | <0.001  | 9,387.8 ± 5,379.6  | <0.001  | 533.9 ± 345.9 | <0.001  |  |
| ssRN40      | 24,331.4 ± 12,833.9   | 0.001   | 3,358.6 ± 2,831.5  | <0.001  | 233.5 ± 209.5 | 0.190   |  |
| ODN2216     | 12,280.9 ± 10,063.2   | 0.474   | 695.6 ± 290.5      | <0.001  | 178.2 ± 139.0 | 0.552   |  |
| LSEC        |                       | IL6     |                    | TNF     |               | IL10    |  |
| Stimulation | mean ± sd             | p-value | mean ± sd          | p-value | mean ± sd     | p-value |  |
| w/o         | 3,156.1 ± 2,819.5     |         | 244.0 ± 180.5      |         | 40.3 ± 35.6   |         |  |
| Pam3CSK4    | 4,428.9 ± 2,866.8     | 0.225   | 512.4 ± 388.8      | 0.020   | 52.0 ± 46.9   | 0.446   |  |
| HKLM        | 4,160.7 ± 3,022.5     | 0.350   | 522.4 ± 399.7      | 0.018   | 46.6 ± 43.4   | 0.667   |  |
| poly(I:C)   | 13,250.3 ± 11,861.0   | 0.003   | 720.9 ± 496.9      | 0.001   | 74.1 ± 55.0   | 0.065   |  |
| LPS         | 5,853.4 ± 3,562.4     | 0.025   | 710.6 ± 602.2      | 0.007   | 58.3 ± 46.1   | 0.240   |  |
| flagellin   | 14,118.1 ± 19,502.0   | 0.039   | 896.8 ± 576.7      | <0.001  | 94.1 ± 72.4   | 0.013   |  |
| FSL-I       | 7,576.4 ± 3,537.6     | <0.001  | 791.0 ± 500.8      | <0.001  | 64.7 ± 48.4   | 0.125   |  |
| Gdq         | 4,165.8 ± 2,442.7     | 0.299   | 326.6 ± 326.1      | 0.395   | 44.0 ± 38.0   | 0.784   |  |
| ssRN40      | 3,944.8 ± 2,480.3     | 0.419   | 493.5 ± 397.4      | 0.032   | 34.7 ± 20.1   | 0.601   |  |
| ODN2216     | 2,527.5 ± 1,969.0     | 0.482   | 216.0 ± 154.9      | 0.650   | 32.9 ± 24.4   | 0.521   |  |
| HSC         |                       | IL6     |                    | TNF     |               | IL10    |  |
| Stimulation | mean ± sd             | p-value | mean ± sd          | p-value | mean ± sd     | p-value |  |
| w/o         | 11,396.2 ± 5,376.1    |         | 61.3 ± 60.0        |         | 12.2 ± 13.6   |         |  |
| Pam3CSK4    | 38,148.5 ± 18,017.5   | <0.001  | 316.9 ± 324.9      | 0.005   | 25.2 ± 33.7   | 0.175   |  |
| HKLM        | 40,810.2 ± 21,262.3   | <0.001  | 810.0 ± 1,059.6    | 0.011   | 43.5 ± 51.9   | 0.032   |  |
| poly(I:C)   | 54,436.2 ± 23,117.5   | <0.001  | 152.5 ± 156.5      | 0.046   | 22.2 ± 22.5   | 0.198   |  |
| LPS         | 63,691.4 ± 27,297.2   | <0.001  | 476.6 ± 634.8      | 0.017   | 41.1 ± 45.7   | 0.035   |  |
| flagellin   | 132,965.1 ± 110,010.5 | <0.001  | 899.9 ± 819.9      | <0.001  | 57.0 ± 55.8   | 0.006   |  |
| FSL-I       | 53,066.1 ± 52,041.3   | 0.004   | 319.3 ± 300.2      | 0.003   | 24.4 ± 22.1   | 0.089   |  |
| Gdq         | 51,273.5 ± 50,818.6   | 0.005   | 489.7 ± 626.3      | 0.013   | 24.0 ± 22.9   | 0.124   |  |
| ssRN40      | 31,228.8 ± 33,671.3   | 0.032   | 248.1 ± 338.9      | 0.044   | 20.2 ± 16.7   | 0.199   |  |
| ODN2216     | 15,212.0 ± 11,629.0   | 0.255   | 71.5 ± 53.1        | 0.631   | 13.8 ± 13.2   | 0.774   |  |

Gene expression of inflammatory cytokines was determined in untreated NPC (w/o) or in cells treated with TLR ligands for 6h (n=15). Data represent copy numbers as mean ± sd normalized to 100,000 copies of reference gene *ACTB*. Abbreviations: FSL-I; synthetic lipoprotein (TLR2/6 ligand); Gdq, Gardiquimod (TLR7 ligand); HKLM, Heat Killed *Listeria monocytogenes* (TLR2 ligand); HSC, hepatic stellate cells; KC, Kupffer cells; LPS, lipopolysaccharide (TLR4 ligand); LSEC, liver sinusoidal endothelial cells; ODN2216, synthetic single-stranded DNA (TLR9 ligand); Pam3CSK4, synthetic triacylated lipopeptide (TLR1/2 ligand); poly(I:C), polyinosinic-polycytidylic acid (TLR3 ligand); sd, standard deviation; ssRNA40, single-stranded RNA oligonucleotide (TLR8 ligand); TLR, toll like receptor; w/o (without treatment)

## Original western blots - Figure 1

KC

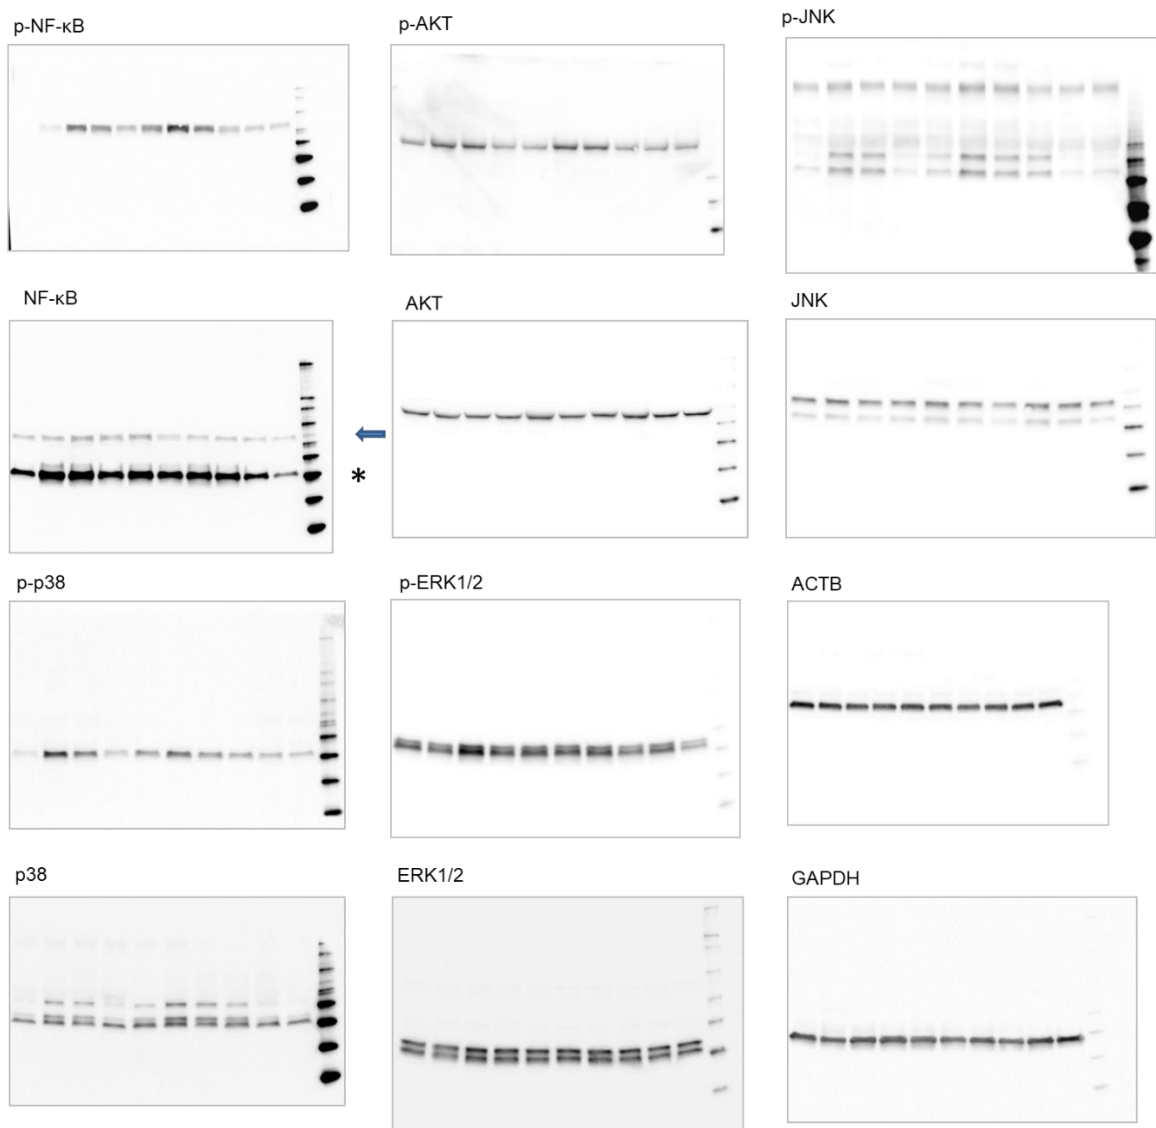

\* Sequential use of blots for staining of proteins with different size.

← band of interest

## Original western blots - Figure 1

### LSEC

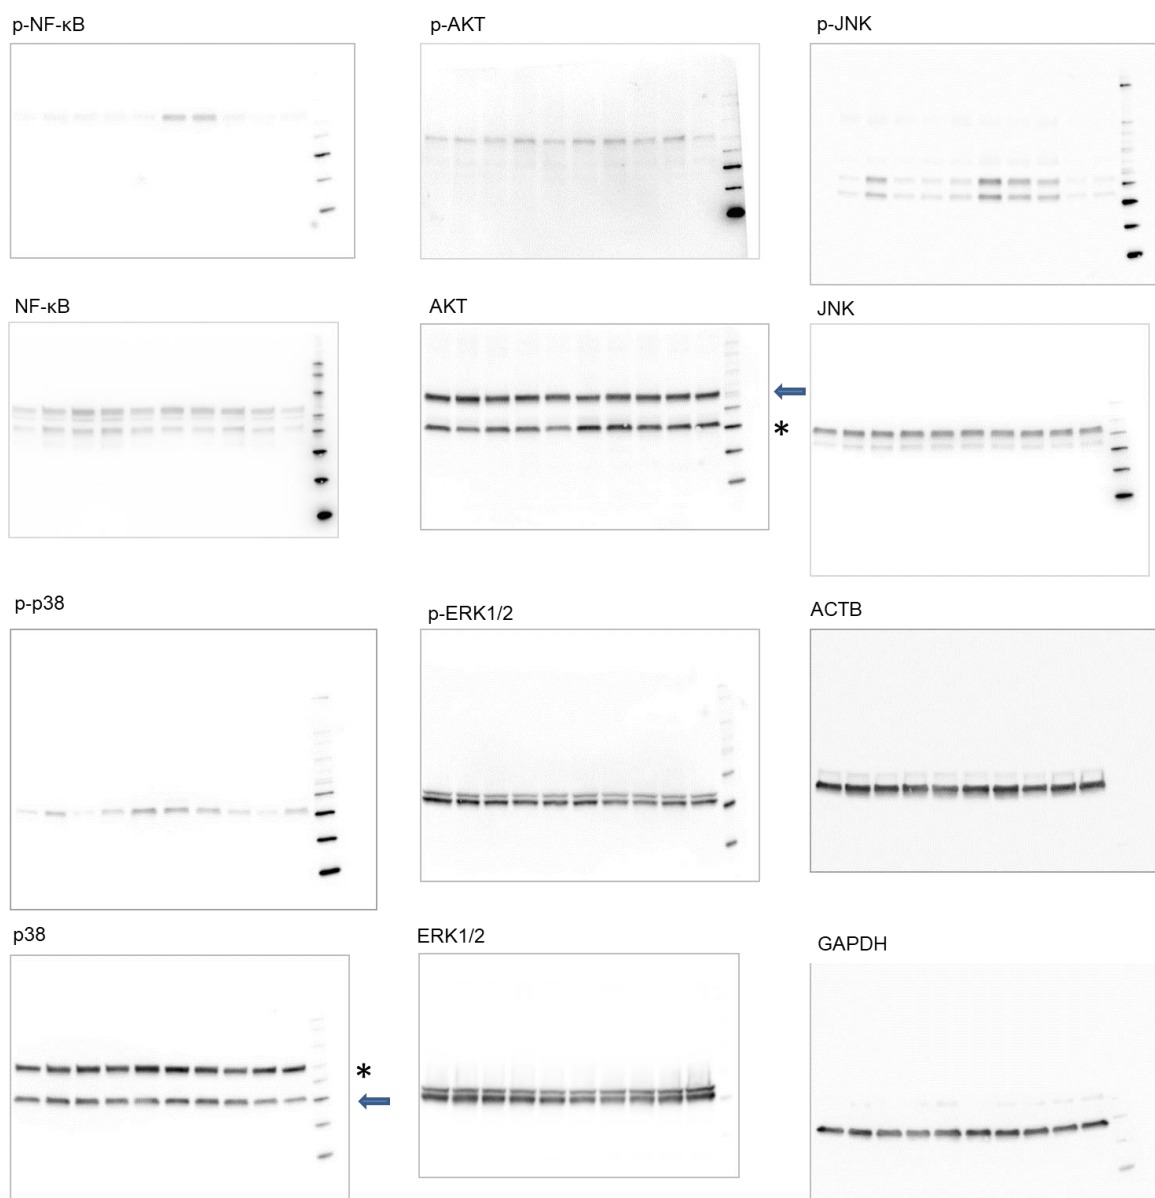

\* Sequential use of blots for staining of proteins with different size.

← band of interest

## Original western blots - Figure 1

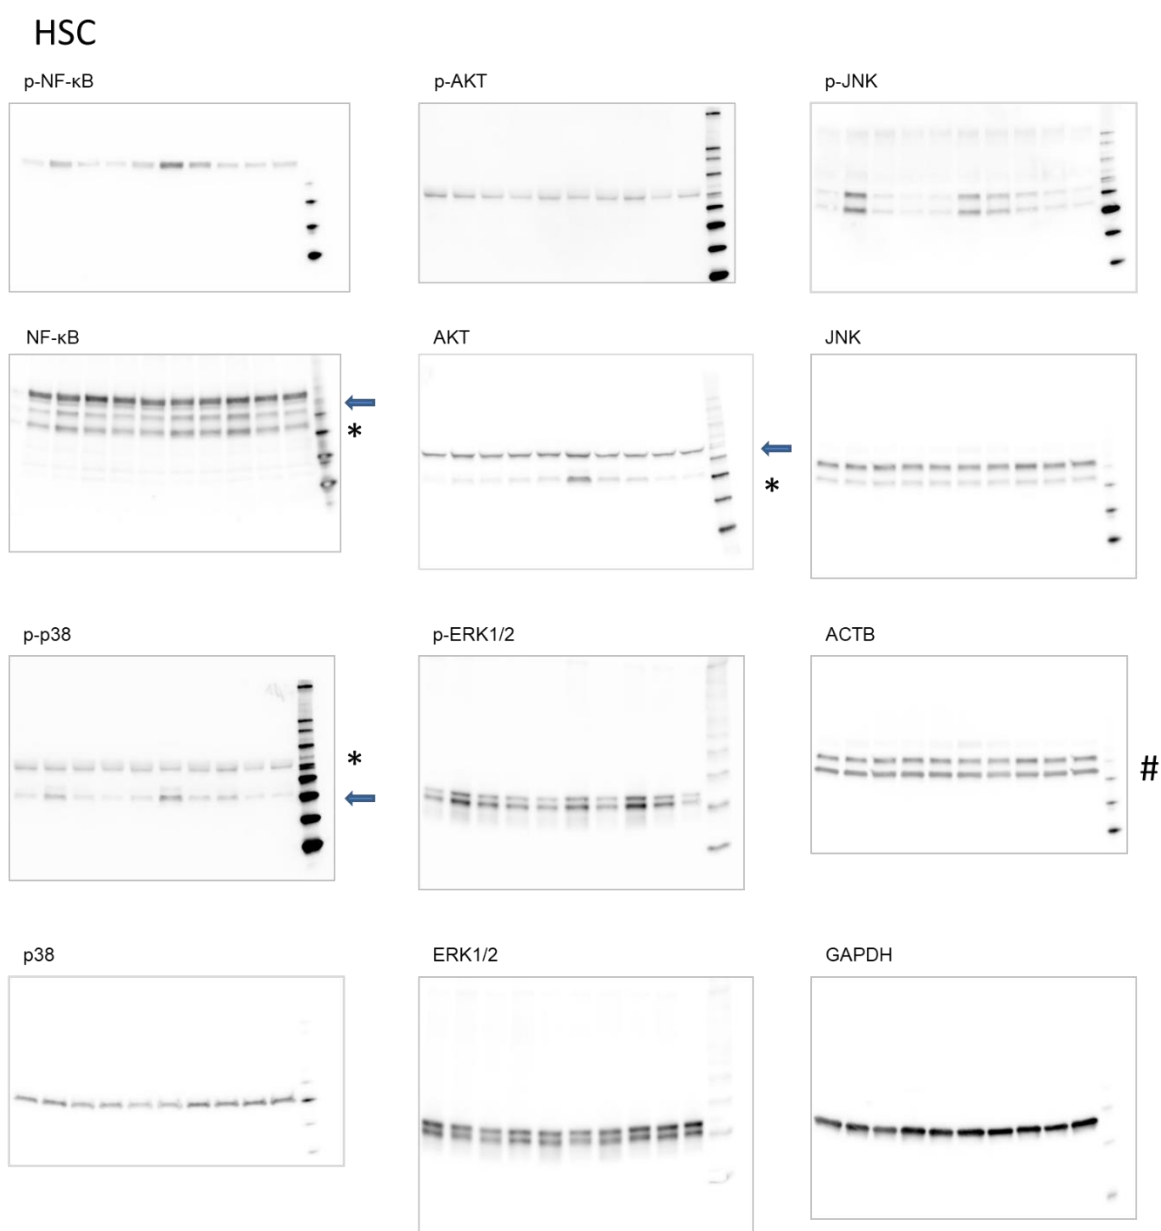

\* Sequential use of blots for staining of proteins with different size.

← band of interest

# double band actin appeared in HSC



## Original western blots - Figure 2

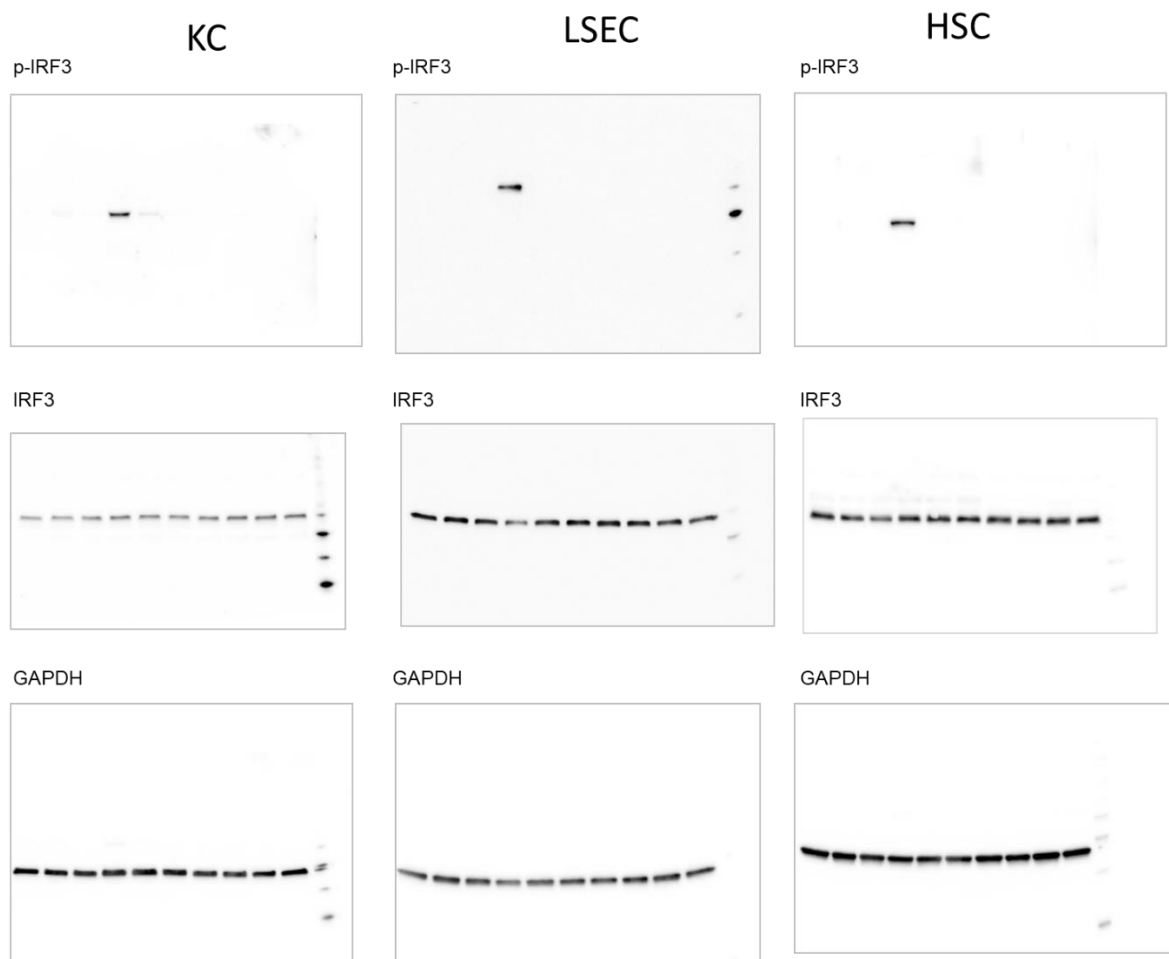

Supplement: s1 [file s1]
